# Supplementary material
Source: PubMed Central journal article supplement (PMC4858952)
Supplement: 10.1074_M115.055905_mcp.M115.055905-1.pdf [file 10.1074_M115.055905_mcp.M115.055905-1.pdf]

**Table S1. Evidence of coordination in the proteomes analyzed**

| <b>Using functional databases</b>       |                             |                                      |                              |                                   |                                                      |                                    |                            |
|-----------------------------------------|-----------------------------|--------------------------------------|------------------------------|-----------------------------------|------------------------------------------------------|------------------------------------|----------------------------|
| <b>Proteome/Stimulus</b>                | <b>Number of categories</b> | <b>Number of changing categories</b> | <b>% Changing categories</b> | <b>Number of Q&gt;C relations</b> | <b>Number of Q&gt;C relations (without outliers)</b> | <b>Number of outlier relations</b> | <b>% Outlier relations</b> |
| <b>Yeast/- (Null Hypothesis)</b>        | 2335                        | 0                                    | 0.0%                         | 61342                             | 61333                                                | 9                                  | 0.0%                       |
| <b>Yeast/H<sub>2</sub>O<sub>2</sub></b> | 2676                        | 104                                  | 3.9%                         | 80193                             | 78941                                                | 1252                               | 1.6%                       |
| <b>Pig heart/infarct</b>                | 1139                        | 119                                  | 10.4%                        | 8853                              | 8705                                                 | 148                                | 1.7%                       |
| <b>Mouse fibroblasts/Zmpste24 KO</b>    | 1383                        | 55                                   | 4.0%                         | 12288                             | 12048                                                | 240                                | 2.0%                       |
| <b>Human secretome/HS vs CE</b>         | 885                         | 126                                  | 14.2%                        | 4747                              | 4412                                                 | 335                                | 7.1%                       |
| <b>Mouse MAM/Caveolin-1 KO</b>          | 3797                        | 213                                  | 5.6%                         | 34770                             | 33483                                                | 1287                               | 3.7%                       |
| <b>Mouse lymphocytes/HDAC6 KO</b>       | 4066                        | 101                                  | 2.5%                         | 123887                            | 121360                                               | 2527                               | 2.0%                       |

| <b>Using randomized functional databases</b> |                             |                                      |                              |                                   |                                                      |                                    |                            |
|----------------------------------------------|-----------------------------|--------------------------------------|------------------------------|-----------------------------------|------------------------------------------------------|------------------------------------|----------------------------|
| <b>Proteome/Stimulus</b>                     | <b>Number of categories</b> | <b>Number of changing categories</b> | <b>% Changing categories</b> | <b>Number of Q&gt;R relations</b> | <b>Number of Q&gt;R relations (without outliers)</b> | <b>Number of outlier relations</b> | <b>% Outlier relations</b> |
| <b>Yeast/- (Null Hypothesis)</b>             | 2335                        | 0                                    | 0.0%                         | 61342                             | 61333                                                | 9                                  | 0.0%                       |
| <b>Yeast/H<sub>2</sub>O<sub>2</sub></b>      | 2676                        | 19                                   | 0.7%                         | 80193                             | 79239                                                | 954                                | 1.2%                       |
| <b>Pig heart/infarct</b>                     | 1139                        | 11                                   | 1.0%                         | 8853                              | 8701                                                 | 152                                | 1.7%                       |
| <b>Mouse fibroblasts/Zmpste24 KO</b>         | 1383                        | 2                                    | 0.1%                         | 12288                             | 12108                                                | 180                                | 1.5%                       |
| <b>Human secretome/HS vs CE</b>              | 885                         | 28                                   | 3.2%                         | 4747                              | 4555                                                 | 192                                | 4.0%                       |
| <b>Mouse MAM/Caveolin-1 KO</b>               | 3797                        | 44                                   | 1.2%                         | 34770                             | 33699                                                | 1071                               | 3.1%                       |
| <b>Mouse lymphocytes/HDAC6 KO</b>            | 4066                        | 18                                   | 0.4%                         | 123887                            | 121312                                               | 2575                               | 2.1%                       |
