# Supplementary material
Source: PubMed Central journal article supplement (PMC4858952)
Supplement: 10.1074_M115.055905_mcp.M115.055905-3.pdf [file 10.1074_M115.055905_mcp.M115.055905-3.pdf]

**Table S3 A. Identification and quantification statistics of the effect of Angiotensin II on the VSMC proteome**

| <b>Duration of AngII-treatment</b> | <b>NS<sup>1</sup></b> | <b>NP<sup>2</sup></b> | <b>NQ<sup>3</sup></b> | <b>k</b> | <b>Scan variance (<math>\sigma_{SP}^2</math>)</b> | <b>Peptide variance (<math>\sigma_{PQ}^2</math>)</b> | <b>Protein variance (<math>\sigma_{QA}^2</math>)</b> | <b>Scan outliers (%)</b> | <b>Peptide outliers (%)</b> | <b>Protein abundance changes</b> |
|------------------------------------|-----------------------|-----------------------|-----------------------|----------|---------------------------------------------------|------------------------------------------------------|------------------------------------------------------|--------------------------|-----------------------------|----------------------------------|
| <b>2h</b>                          | 165226                | 30249                 | 5633                  | 1372.32  | 0.0390                                            | 0.0472                                               | 0.0008                                               | 2.93                     | 3.01                        | 40                               |
| <b>4h</b>                          |                       |                       |                       | 1035.99  | 0.0429                                            | 0.0352                                               | 0.0024                                               | 2.66                     | 3.03                        | 64                               |
| <b>6h</b>                          |                       |                       |                       | 1040.51  | 0.0331                                            | 0.0278                                               | 0.0020                                               | 2.56                     | 3.08                        | 65                               |
| <b>8h</b>                          |                       |                       |                       | 1581.01  | 0.0358                                            | 0.0400                                               | 0.0025                                               | 2.69                     | 3.16                        | 66                               |
| <b>10h</b>                         |                       |                       |                       | 1179.71  | 0.0378                                            | 0.0393                                               | 0.0012                                               | 2.60                     | 3.29                        | 76                               |

<sup>1</sup>Number of scans quantified; <sup>2</sup>Number of peptides quantified; <sup>3</sup>Number of proteins quantified. All the identified proteins were quantified. Scan and peptide outliers were detected at 1%FDR, whereas protein outliers (i.e., abundance changes) were detected at 5% FDR.
