# Supplementary material
Source: PubMed Central journal article supplement (PMC4858952)
Supplement: 10.1074_M115.055905_mcp.M115.055905-4.pdf [file 10.1074_M115.055905_mcp.M115.055905-4.pdf]

**Table S3 B. Systems biology statistics of the effect of Angiotensin II on the VSMC proteome**

| <b>Duration of AngII-treatment</b> | <b>NC<sup>1</sup></b> | <b><i>Protein to category variance (<math>\sigma_{QC}^2</math>)</i></b> | <b><i>Protein to category relations</i></b> | <b><i>Protein to category outliers (%)</i></b> | <b>Category variance (<math>\sigma_{QA}^2</math>)</b> | <b>Category changes<sup>2</sup></b> |
|------------------------------------|-----------------------|-------------------------------------------------------------------------|---------------------------------------------|------------------------------------------------|-------------------------------------------------------|-------------------------------------|
| <b>2h</b>                          | 4579                  | 0.0008                                                                  | 227346                                      | 1.19%                                          | 0.00014                                               | 7                                   |
| <b>4h</b>                          |                       | 0.0024                                                                  |                                             | 2.21%                                          | 0.00022                                               | 98                                  |
| <b>6h</b>                          |                       | 0.0020                                                                  |                                             | 2.32%                                          | 0.00015                                               | 126                                 |
| <b>8h</b>                          |                       | 0.0025                                                                  |                                             | 1.78%                                          | 0.00022                                               | 152                                 |
| <b>10h</b>                         |                       | 0.0012                                                                  |                                             | 2.07%                                          | 0.00027                                               | 92                                  |

<sup>1</sup>Number of categories quantified. <sup>2</sup>After *protein to category* outlier removal. *Protein to category* outliers were detected at 1% FDR, whereas category outliers were detected at 5% FDR.
